# Supplementary material for: A dynamic prediction of stability for nitromethane in external electric field
Source: Royal Society of Chemistry journal article supplement (doi:10.1039/c7ra06290g), 2017-01-01
Supplement: c7ra06290g1.pdf [file c7ra06290g1.pdf]

## Supporting information

### A dynamic prediction of stability for nitromethane in external electric field

Fu-de Ren, Duan-lin Cao and Wen-jing Shi and Min You

E-mail address: [fdren888@126.com](mailto:fdren888@126.com)

#### Supplementary Tables

- Table S1** Total energies of  $\text{CH}_3\text{NO}_2$  and radicals, and the C–NO<sub>2</sub> bond dissociation energies in the different external electric field strengths and orientations at the CCSD/6-311++G(2d,p)//MP2/6-311++G(2d,p) level.
- Table S2** Total energies of the reactants and transition states, and barriers of three decomposition paths in the different external electric field strengths and orientations at the CCSD/6-311++G(2d,p)//MP2/6-311++G(2d,p) level.
- Table S3** The optimized geometrical parameters and AIM results of TS-2 in the different field strengths and orientations at the MP2/6-311++G(2d,p) level.
- Table S4 part1.** The optimized geometrical parameters and AIM results of TS-3 in the different field strengths and orientations at the MP2/6-311++G(2d,p) level.
- Table S4 part2.** The optimized geometrical parameters and AIM results of TS-3 in the different field strengths and orientations at the MP2/6-311++G(2d,p) level.
- Fig. S1** Selected structures of the nitromethane dimer in the different external electric field strengths and orientations (including those in no field) at the MP2/6-311++G(2d,p) level.

**Table S1** Total energies of CH<sub>3</sub>NO<sub>2</sub> and radicals ( $E$ , a.u.), and the C–NO<sub>2</sub> bond dissociation energies (BDE, kJ/mol) in the different external electric field strengths and orientations at the CCSD/6-311++G(2d,p)//MP2/6-311++G(2d,p) level.

| Field (a.u.) | $E_{\text{CH}_3\text{NO}_2}$ /(a.u.) | $E_{\text{CH}_3}$ /(a.u.) | $E_{\text{NO}_2}$ /(a.u.) | BDE/(kJ/mol) |
|--------------|--------------------------------------|---------------------------|---------------------------|--------------|
| Z -0.010     | -244.5323                            | -39.7158                  | -204.7114                 | 275.90       |
| Z -0.008     | -244.5323                            | -39.7159                  | -204.7114                 | 275.73       |
| Z -0.006     | -244.5323                            | -39.7160                  | -204.7114                 | 275.56       |
| Z -0.004     | -244.5323                            | -39.7160                  | -204.7114                 | 275.40       |
| Z -0.002     | -244.5324                            | -39.7161                  | -204.7114                 | 275.29       |
| Z +0.002     | -244.5324                            | -39.7161                  | -204.7114                 | 275.30       |
| Z +0.004     | -244.5324                            | -39.7160                  | -204.7114                 | 275.41       |
| Z +0.006     | -244.5323                            | -39.7160                  | -204.7114                 | 275.55       |
| Z +0.008     | -244.5323                            | -39.7159                  | -204.7114                 | 275.71       |
| Z +0.010     | -244.5322                            | -39.7158                  | -204.7114                 | 275.88       |
| X -0.010     | -244.5345                            | -39.7161                  | -204.7114                 | 280.90       |
| X -0.008     | -244.5337                            | -39.7161                  | -204.7114                 | 278.86       |
| X -0.006     | -244.5331                            | -39.7161                  | -204.7114                 | 277.28       |
| X -0.004     | -244.5324                            | -39.7161                  | -204.7112                 | 275.80       |
| X -0.002     | -244.5324                            | -39.7161                  | -204.7114                 | 275.38       |
| X +0.002     | -244.5324                            | -39.7161                  | -204.7114                 | 275.38       |
| X +0.004     | -244.5324                            | -39.7161                  | -204.7112                 | 275.80       |
| X +0.006     | -244.5331                            | -39.7161                  | -204.7114                 | 277.27       |
| X +0.008     | -244.5337                            | -39.7161                  | -204.7114                 | 278.86       |
| X +0.010     | -244.5345                            | -39.7161                  | -204.7114                 | 280.90       |
| Y -0.010     | -244.5323                            | -39.7161                  | -204.7114                 | 274.97       |
| Y -0.008     | -244.5323                            | -39.7161                  | -204.7114                 | 275.07       |
| Y -0.006     | -244.5323                            | -39.7161                  | -204.7114                 | 275.14       |
| Y -0.004     | -244.5323                            | -39.7161                  | -204.7114                 | 275.19       |
| Y -0.002     | -244.5324                            | -39.7161                  | -204.7114                 | 275.23       |
| Y +0.002     | -244.5324                            | -39.7161                  | -204.7114                 | 275.24       |
| Y +0.004     | -244.5324                            | -39.7161                  | -204.7114                 | 275.23       |
| Y +0.006     | -244.5324                            | -39.7161                  | -204.7114                 | 275.20       |
| Y +0.008     | -244.5323                            | -39.7161                  | -204.7114                 | 275.15       |
| Y +0.010     | -244.5323                            | -39.7161                  | -204.7114                 | 275.07       |

**Table S2** Total energies of the reactants and transition states ( $E$ , a.u.), and barriers ( $E_a$ , kJ/mol) of three decomposition paths in the different external electric field strengths and orientations at the CCSD/6-311++G(2d,p)//MP2/6-311++G(2d,p) level.

| Field (a.u.) | $E_{(TS-1)}$<br>/(a.u.) | $E_{CH_3NO_2}$<br>/(a.u.) | $E_{a(TS-1)}$<br>/(kJ/mol) | $E_{(TS-2)}$<br>/(a.u.) | $E_{a(TS-2)}$<br>/(kJ/mol) | $E_{(TS-3)}$<br>/(a.u.) | $E_{CH_3NO_2 \dots CH_3NO_2}$<br>/(a.u.) | $E_{a(TS-3)}$<br>/(kJ/mol) |
|--------------|-------------------------|---------------------------|----------------------------|-------------------------|----------------------------|-------------------------|------------------------------------------|----------------------------|
| Z -0.010     | -244.407667             | -244.532254               | 327.10                     | -244.422794             | 287.39                     | -488.967368             | -489.104419                              | 359.83                     |
| Z -0.008     | -244.409321             | -244.532295               | 322.87                     | -244.423173             | 286.50                     | -488.968121             | -489.097012                              | 338.40                     |
| Z -0.006     | -244.411193             | -244.532326               | 318.03                     | -244.423445             | 285.87                     | -488.968979             | -489.089803                              | 317.22                     |
| Z -0.004     | -244.413286             | -244.532348               | 312.60                     | -244.423627             | 285.45                     | -488.969958             | -489.080224                              | 289.50                     |
| Z -0.002     | -244.415603             | -244.532362               | 306.55                     | -244.423740             | 285.19                     | -488.971021             | -489.077643                              | 279.94                     |
| Z +0.002     | -244.420923             | -244.532362               | 292.58                     | -244.423743             | 285.18                     | -488.971021             | -489.077643                              | 279.94                     |
| Z +0.004     | -244.423939             | -244.532348               | 284.63                     | -244.423645             | 285.40                     | -488.969958             | -489.083129                              | 297.13                     |
| Z +0.006     | -244.427202             | -244.532324               | 276.00                     | -244.423501             | 285.72                     | -488.968979             | -489.089900                              | 317.48                     |
| Z +0.008     | -244.430723             | -244.532291               | 266.67                     | -244.423296             | 286.16                     | -488.968104             | -489.097014                              | 338.45                     |
| Z +0.010     | -244.434518             | -244.532254               | 256.61                     | -244.423048             | 286.70                     | -488.967368             | -489.104432                              | 359.86                     |
| X -0.010     | -244.422718             | -244.534521               | 293.54                     | -244.423547             | 291.36                     |                         |                                          |                            |
| X -0.008     | -244.421554             | -244.533746               | 294.56                     | -244.423629             | 289.11                     |                         |                                          |                            |
| X -0.006     | -244.420514             | -244.533143               | 295.71                     | -244.423694             | 287.36                     | -488.971091             | -489.080681                              | 287.73                     |
| X -0.004     | -244.419599             | -244.532352               | 296.03                     | -244.423739             | 285.16                     | -488.971380             | -489.078697                              | 281.76                     |
| X -0.002     | -244.418809             | -244.532363               | 298.14                     | -244.423768             | 285.12                     | -488.971555             | -489.077208                              | 277.39                     |
| X +0.002     | -244.417614             | -244.532363               | 301.27                     | -244.423765             | 285.12                     | -488.971553             | -489.077569                              | 278.34                     |
| X +0.004     | -244.417214             | -244.532352               | 302.30                     | -244.423739             | 285.16                     | -488.971364             | -489.081509                              | 289.19                     |
| X +0.006     | -244.416949             | -244.533142               | 305.06                     | -244.423677             | 287.40                     | -488.971043             | -489.086179                              | 302.29                     |
| X +0.008     | -244.416827             | -244.533745               | 306.97                     | -244.423611             | 289.16                     | -488.970587             | -489.091265                              | 316.84                     |
| X +0.010     | -244.416854             | -244.534520               | 308.93                     | -244.423511             | 291.45                     | -488.969949             | -489.096784                              | 333.01                     |
| Y -0.010     | -244.423983             | -244.532264               | 284.29                     | -244.423659             | 285.14                     | -488.991158             | -489.080778                              | 235.30                     |
| Y -0.008     | -244.422509             | -244.532301               | 288.26                     | -244.423703             | 285.13                     | -488.986618             | -489.079316                              | 243.38                     |
| Y -0.006     | -244.421189             | -244.532330               | 291.80                     | -244.423734             | 285.12                     | -488.982384             | -489.078141                              | 251.41                     |
| Y -0.004     | -244.420022             | -244.532351               | 294.92                     | -244.423757             | 285.11                     | -488.978474             | -489.077248                              | 259.33                     |
| Y -0.002     | -244.419008             | -244.532366               | 297.62                     | -244.423771             | 285.11                     | -488.974885             | -489.076640                              | 267.16                     |
| Y +0.002     | -244.417440             | -244.532366               | 301.74                     | -244.423772             | 285.11                     | -488.968669             | -489.076297                              | 282.58                     |
| Y +0.004     | -244.416886             | -244.532351               | 303.15                     | -244.423756             | 285.12                     | -488.966041             | -489.081863                              | 304.09                     |
| Y +0.006     | -244.416489             | -244.532331               | 304.14                     | -244.423736             | 285.12                     | -488.963736             | -489.087033                              | 323.72                     |
| Y +0.008     | -244.416249             | -244.532301               | 304.69                     | -244.423703             | 285.12                     | -488.961709             | -489.092592                              | 343.63                     |
| Y +0.010     | -244.416171             | -244.532263               | 304.80                     | -244.423664             | 285.13                     | -488.960110             | -489.098490                              | 363.32                     |

**Table S3** The optimized geometrical parameters ( $\text{\AA}$ ) and AIM results (a.u.) of TS-2 in the different field strengths and orientations at the MP2/6-311++G(2d,p) level.

| Field (a.u.) | $R_{C1\cdots H5}$ | $R_{N2-O4}$ | $R_{O4\cdots H5}$ | $\rho_{C1\cdots H}$ | $\rho_{N2-O4}$ | $\rho_{O4\cdots H5}$ | $\nabla^2\rho_{C1\cdots H5}$ | $\nabla^2\rho_{N2-O4}$ | $\nabla^2\rho_{O4\cdots H5}$ |
|--------------|-------------------|-------------|-------------------|---------------------|----------------|----------------------|------------------------------|------------------------|------------------------------|
| No Field     | 1.4752            | 1.3219      | 1.2461            | 0.1082              | 0.4072         | 0.1579               | -0.0830                      | -0.5958                | -0.2911                      |
| Z -0.0100    | 1.5003            | 1.3127      | 1.2123            | 0.1028              | 0.4162         | 0.1719               | -0.0564                      | -0.6517                | -0.4570                      |
| Z -0.0080    | 1.4948            | 1.3146      | 1.2189            | 0.1039              | 0.4143         | 0.1691               | -0.0614                      | -0.6399                | -0.4213                      |
| Z -0.0060    | 1.4898            | 1.3166      | 1.2255            | 0.1049              | 0.4124         | 0.1664               | -0.0663                      | -0.6281                | -0.3874                      |
| Z -0.0040    | 1.4850            | 1.3183      | 1.2321            | 0.1060              | 0.4107         | 0.1636               | -0.0715                      | -0.6176                | -0.3548                      |
| Z -0.0020    | 1.4800            | 1.3201      | 1.2392            | 0.1071              | 0.4090         | 0.1607               | -0.0772                      | -0.6066                | -0.3220                      |
| Z +0.0020    | 1.4703            | 1.3237      | 1.2536            | 0.1094              | 0.4055         | 0.1550               | -0.0893                      | -0.5848                | -0.2600                      |
| Z +0.0040    | 1.4657            | 1.3255      | 1.2608            | 0.1106              | 0.4037         | 0.1522               | -0.0953                      | -0.5737                | -0.2317                      |
| Z +0.0060    | 1.4614            | 1.3270      | 1.2675            | 0.1117              | 0.4022         | 0.1496               | -0.1012                      | -0.5643                | -0.2065                      |
| Z +0.0080    | 1.4570            | 1.3288      | 1.2748            | 0.1129              | 0.4005         | 0.1469               | -0.1074                      | -0.5537                | -0.1812                      |
| Z +0.0100    | 1.4523            | 1.3304      | 1.2822            | 0.1141              | 0.3989         | 0.1441               | -0.1140                      | -0.5434                | -0.1566                      |
| X -0.0100    | 1.4755            | 1.3067      | 1.2626            | 0.1094              | 0.4220         | 0.1508               | -0.0963                      | -0.6650                | -0.2242                      |
| X -0.0080    | 1.4749            | 1.3095      | 1.2595            | 0.1093              | 0.4192         | 0.1521               | -0.0941                      | -0.6517                | -0.2358                      |
| X -0.0060    | 1.4751            | 1.3125      | 1.2560            | 0.1090              | 0.4163         | 0.1536               | -0.0913                      | -0.6380                | -0.2496                      |
| X -0.0040    | 1.4750            | 1.3155      | 1.2526            | 0.1088              | 0.4134         | 0.1551               | -0.0885                      | -0.6243                | -0.2635                      |
| X -0.0020    | 1.4749            | 1.3186      | 1.2503            | 0.1086              | 0.4103         | 0.1561               | -0.0866                      | -0.6097                | -0.2734                      |
| X +0.0020    | 1.4751            | 1.3255      | 1.2429            | 0.1080              | 0.4038         | 0.1594               | -0.0800                      | -0.5802                | -0.3058                      |
| X +0.0040    | 1.4758            | 1.3291      | 1.2396            | 0.1076              | 0.4004         | 0.1609               | -0.0768                      | -0.5652                | -0.3211                      |
| X +0.0060    | 1.4756            | 1.3331      | 1.2380            | 0.1075              | 0.3967         | 0.1616               | -0.0755                      | -0.5480                | -0.3287                      |
| X +0.0080    | 1.4763            | 1.3370      | 1.2347            | 0.1071              | 0.3931         | 0.1632               | -0.0720                      | -0.5322                | -0.3453                      |
| X +0.0100    | 1.4770            | 1.3412      | 1.2318            | 0.1067              | 0.3892         | 0.1645               | -0.0691                      | -0.5158                | -0.3598                      |
| Y -0.0100    | 1.4772            | 1.3222      | 1.2498            | 0.1084              | 0.4069         | 0.1563               | -0.0858                      | -0.5927                | -0.2740                      |
| Y -0.0080    | 1.4770            | 1.3222      | 1.2486            | 0.1083              | 0.4070         | 0.1568               | -0.0849                      | -0.5935                | -0.2790                      |
| Y -0.0060    | 1.4767            | 1.3219      | 1.2467            | 0.1082              | 0.4072         | 0.1576               | -0.0832                      | -0.5954                | -0.2874                      |
| Y -0.0040    | 1.4762            | 1.3219      | 1.2465            | 0.1082              | 0.4073         | 0.1578               | -0.0831                      | -0.5957                | -0.2890                      |
| Y -0.0020    | 1.4760            | 1.3220      | 1.2478            | 0.1082              | 0.4071         | 0.1572               | -0.0840                      | -0.5946                | -0.2843                      |
| Y +0.0020    | 1.4749            | 1.3219      | 1.2455            | 0.1082              | 0.4072         | 0.1582               | -0.0824                      | -0.5959                | -0.2942                      |
| Y +0.0040    | 1.4739            | 1.3221      | 1.2458            | 0.1083              | 0.4070         | 0.1581               | -0.0828                      | -0.5949                | -0.2932                      |
| Y +0.0060    | 1.4743            | 1.3221      | 1.2446            | 0.1081              | 0.4070         | 0.1586               | -0.0815                      | -0.5955                | -0.2991                      |
| Y +0.0080    | 1.4732            | 1.3222      | 1.2447            | 0.1082              | 0.4070         | 0.1586               | -0.0818                      | -0.5952                | -0.2989                      |
| Y +0.0100    | 1.4724            | 1.3223      | 1.2444            | 0.1083              | 0.4068         | 0.1587               | -0.0819                      | -0.5945                | -0.2998                      |

**Table S4** part1 The optimized geometrical parameters ( $\text{\AA}$ ) and AIM results (a.u.) of TS-3 in the different field strengths and orientations at the MP2/6-311++G(2d,p) level.

| Field    | $R_{\text{N2-O4}}$ | $R_{\text{C1}\cdots\text{H}}$ | $R_{\text{O4}\cdots\text{H}}$ | $\rho_{\text{N2-O4}}$ | $\rho_{\text{C1}\cdots\text{H}}$ | $\rho_{\text{O4}\cdots\text{H}}$ | $\nabla^2\rho_{\text{N2-O4}}$ | $\nabla^2\rho_{\text{C1}\cdots\text{H}}$ | $\nabla^2\rho_{\text{O4}\cdots\text{H}}$ |
|----------|--------------------|-------------------------------|-------------------------------|-----------------------|----------------------------------|----------------------------------|-------------------------------|------------------------------------------|------------------------------------------|
| No Field | 1.3205             | 1.4565                        | 1.1701                        | 0.4048                | 0.1138                           | 0.1875                           | -0.6129                       | -0.1282                                  | -0.6114                                  |
| Z-0.0100 | 1.3494             | 1.9043                        | 1.0096                        | 0.3932                | 0.1478                           | 0.1440                           | -0.5595                       | -0.2845                                  | -0.1269                                  |
| Z-0.0080 | 1.3426             | 1.8308                        | 1.0224                        | 0.3957                | 0.1519                           | 0.1412                           | -0.5618                       | -0.3064                                  | -0.0978                                  |
| Z-0.0060 | 1.3360             | 1.7583                        | 1.0390                        | 0.3983                | 0.1535                           | 0.1408                           | -0.5672                       | -0.3150                                  | -0.0888                                  |
| Z-0.0040 | 1.3298             | 1.6788                        | 1.0625                        | 0.4009                | 0.1509                           | 0.1444                           | -0.5754                       | -0.3013                                  | -0.1132                                  |
| Z-0.0020 | 1.3241             | 1.5790                        | 1.1017                        | 0.4035                | 0.1402                           | 0.1564                           | -0.5900                       | -0.2466                                  | -0.2221                                  |
| Z+0.0020 | 1.3211             | 1.3741                        | 1.2341                        | 0.4022                | 0.0847                           | 0.2284                           | -0.6253                       | -0.0284                                  | -1.2387                                  |
| Z+0.0040 | 1.3233             | 1.3423                        | 1.2652                        | 0.3973                | 0.0662                           | 0.2579                           | -0.6205                       | 0.0161                                   | -1.6491                                  |
| Z+0.0080 | 1.3426             | 1.8329                        | 1.0221                        | 0.3860                | 0.0453                           | 0.2943                           | -0.5924                       | 0.0478                                   | -2.0818                                  |
| X-0.0100 | 1.3074             | 1.4812                        | 1.1537                        | 0.4179                | 0.1059                           | 0.1959                           | -0.6855                       | -0.0995                                  | -0.7376                                  |
| X-0.0080 | 1.3100             | 1.4752                        | 1.1571                        | 0.4153                | 0.1078                           | 0.1940                           | -0.6704                       | -0.1058                                  | -0.7087                                  |
| X-0.0060 | 1.3125             | 1.4694                        | 1.1607                        | 0.4128                | 0.1095                           | 0.1922                           | -0.6561                       | -0.1120                                  | -0.6805                                  |
| X-0.0040 | 1.3151             | 1.4634                        | 1.1643                        | 0.4102                | 0.1113                           | 0.1903                           | -0.6415                       | -0.1188                                  | -0.6516                                  |
| X-0.0020 | 1.3178             | 1.4612                        | 1.1664                        | 0.4075                | 0.1122                           | 0.1894                           | -0.6276                       | -0.1221                                  | -0.6377                                  |
| X+0.0020 | 1.3234             | 1.4543                        | 1.1725                        | 0.4021                | 0.1147                           | 0.1864                           | -0.5985                       | -0.1318                                  | -0.5960                                  |
| X+0.0040 | 1.3261             | 1.4519                        | 1.1751                        | 0.3994                | 0.1156                           | 0.1851                           | -0.5847                       | -0.1357                                  | -0.5795                                  |
| X+0.0060 | 1.3290             | 1.4523                        | 1.1764                        | 0.3967                | 0.1158                           | 0.1847                           | -0.5714                       | -0.1365                                  | -0.5750                                  |
| X+0.0080 | 1.3318             | 1.4510                        | 1.1786                        | 0.3940                | 0.1164                           | 0.1837                           | -0.5578                       | -0.1394                                  | -0.5621                                  |
| X+0.0100 | 1.3347             | 1.4557                        | 1.1773                        | 0.3913                | 0.1154                           | 0.1846                           | -0.5457                       | -0.1354                                  | -0.5769                                  |
| Y-0.0100 | 1.3172             | 1.4441                        | 1.1867                        | 0.4062                | 0.1201                           | 0.1773                           | -0.6098                       | -0.1570                                  | -0.4737                                  |
| Y-0.0080 | 1.3184             | 1.4436                        | 1.1848                        | 0.4063                | 0.1178                           | 0.1808                           | -0.6134                       | -0.1468                                  | -0.5190                                  |
| Y-0.0060 | 1.3188             | 1.4443                        | 1.1825                        | 0.4060                | 0.1161                           | 0.1831                           | -0.6141                       | -0.1395                                  | -0.5514                                  |
| Y-0.0040 | 1.3193             | 1.4488                        | 1.1778                        | 0.4056                | 0.1155                           | 0.1844                           | -0.6136                       | -0.1364                                  | -0.5685                                  |
| Y-0.0020 | 1.3199             | 1.4532                        | 1.1736                        | 0.4052                | 0.1148                           | 0.1859                           | -0.6130                       | -0.1328                                  | -0.5881                                  |
| Y+0.0020 | 1.3213             | 1.4593                        | 1.1671                        | 0.4045                | 0.1126                           | 0.1894                           | -0.6132                       | -0.1228                                  | -0.6382                                  |
| Y+0.0040 | 1.3222             | 1.4609                        | 1.1650                        | 0.4042                | 0.1113                           | 0.1914                           | -0.6134                       | -0.1174                                  | -0.6666                                  |
| Y+0.0060 | 1.3233             | 1.4635                        | 1.1618                        | 0.4040                | 0.1106                           | 0.1924                           | -0.6132                       | -0.1141                                  | -0.6826                                  |
| Y+0.0080 | 1.3237             | 1.4652                        | 1.1601                        | 0.4035                | 0.1093                           | 0.1942                           | -0.6125                       | -0.1090                                  | -0.7096                                  |
| Y+0.0100 | 1.3263             | 1.4673                        | 1.1573                        | 0.4035                | 0.1089                           | 0.1948                           | -0.6133                       | -0.1069                                  | -0.7178                                  |

**Table S4** part2 The optimized geometrical parameters ( $\text{\AA}$ ) and AIM results (a.u.) of TS-3 in the different field strengths and orientations at the MP2/6-311++G(2d,p) level.

| Field    | $R_{N2'-O4'}$ | $R_{C1...H}$ | $R_{H5...O}$ | $\rho_{N2'-O4'}$ | $\rho_{C1...H}$ | $\rho_{H5...O}$ | $\nabla^2\rho_{N2'-O4'}$ | $\nabla^2\rho_{C1...H}$ | $\nabla^2\rho_{H5...O}$ |
|----------|---------------|--------------|--------------|------------------|-----------------|-----------------|--------------------------|-------------------------|-------------------------|
| Z-0.0100 | 1.3310        | 1.3433       | 1.2715       | 0.3800           | 0.0380          | 0.3072          | -0.5751                  | 0.0532                  | -2.2218                 |
| Z-0.0080 | 1.3284        | 1.3352       | 1.2769       | 0.3860           | 0.0455          | 0.2941          | -0.5922                  | 0.0477                  | -2.0788                 |
| Z-0.0060 | 1.3257        | 1.3334       | 1.2762       | 0.3918           | 0.0544          | 0.2784          | -0.6082                  | 0.0367                  | -1.8989                 |
| Z-0.0040 | 1.3233        | 1.3419       | 1.2656       | 0.3973           | 0.0660          | 0.2582          | -0.6208                  | 0.0165                  | -1.6531                 |
| Z-0.0020 | 1.3211        | 1.3725       | 1.2354       | 0.4022           | 0.0842          | 0.2290          | -0.6258                  | -0.0271                 | -1.2485                 |
| Z+0.0020 | 1.3241        | 1.5763       | 1.1026       | 0.4035           | 0.1396          | 0.1569          | -0.5904                  | -0.2439                 | -0.2280                 |
| Z+0.0040 | 1.3299        | 1.6773       | 1.0629       | 0.4009           | 0.1507          | 0.1446          | -0.5757                  | -0.3003                 | -0.1147                 |
| Z+0.0080 | 1.3426        | 1.8329       | 1.0221       | 0.3957           | 0.1520          | 0.1411          | -0.5617                  | -0.3070                 | -0.0968                 |
| X-0.0100 | 1.3378        | 1.4194       | 1.1913       | 0.3884           | 0.1246          | 0.1764          | -0.5231                  | -0.1714                 | -0.4485                 |
| X-0.0080 | 1.3340        | 1.4269       | 1.1864       | 0.3920           | 0.1223          | 0.1789          | -0.5420                  | -0.1615                 | -0.4833                 |
| X-0.0060 | 1.3306        | 1.4354       | 1.1810       | 0.3952           | 0.1197          | 0.1817          | -0.5597                  | -0.1510                 | -0.5222                 |
| X-0.0040 | 1.3271        | 1.4437       | 1.1764       | 0.3985           | 0.1173          | 0.1841          | -0.5780                  | -0.1415                 | -0.5587                 |
| X-0.0020 | 1.3237        | 1.4487       | 1.1741       | 0.4017           | 0.1159          | 0.1853          | -0.5955                  | -0.1363                 | -0.5780                 |
| X+0.0020 | 1.3173        | 1.4616       | 1.1682       | 0.4079           | 0.1124          | 0.1885          | -0.6300                  | -0.1236                 | -0.6290                 |
| X+0.0040 | 1.3144        | 1.4663       | 1.1664       | 0.4108           | 0.1112          | 0.1895          | -0.6460                  | -0.1194                 | -0.6461                 |
| X+0.0060 | 1.3116        | 1.4684       | 1.1662       | 0.4136           | 0.1107          | 0.1896          | -0.6610                  | -0.1180                 | -0.6493                 |
| X+0.0080 | 1.3088        | 1.4715       | 1.1661       | 0.4163           | 0.1100          | 0.1896          | -0.6760                  | -0.1161                 | -0.6533                 |
| X+0.0100 | 1.3061        | 1.4679       | 1.1698       | 0.4189           | 0.1111          | 0.1876          | -0.6892                  | -0.1209                 | -0.6261                 |
| Y-0.0100 | 1.3189        | 1.4382       | 1.1901       | 0.4079           | 0.1183          | 0.1791          | -0.6196                  | -0.1500                 | -0.4985                 |
| Y-0.0080 | 1.3188        | 1.4449       | 1.1833       | 0.4067           | 0.1182          | 0.1800          | -0.6151                  | -0.1487                 | -0.5090                 |
| Y-0.0060 | 1.3192        | 1.4503       | 1.1787       | 0.4064           | 0.1179          | 0.1811          | -0.6147                  | -0.1466                 | -0.5228                 |
| Y-0.0040 | 1.3196        | 1.4519       | 1.1762       | 0.4060           | 0.1164          | 0.1835          | -0.6147                  | -0.1397                 | -0.5552                 |
| Y-0.0020 | 1.3201        | 1.4537       | 1.1733       | 0.4054           | 0.1149          | 0.1857          | -0.6141                  | -0.1333                 | -0.5858                 |
| Y+0.0020 | 1.3209        | 1.4602       | 1.1665       | 0.4042           | 0.1128          | 0.1891          | -0.6113                  | -0.1238                 | -0.6337                 |
| Y+0.0040 | 1.3213        | 1.4638       | 1.1627       | 0.4033           | 0.1122          | 0.1902          | -0.6079                  | -0.1208                 | -0.6493                 |
| Y+0.0060 | 1.3216        | 1.4659       | 1.1607       | 0.4023           | 0.1113          | 0.1918          | -0.6046                  | -0.1165                 | -0.6726                 |
| Y+0.0080 | 1.3221        | 1.4699       | 1.1575       | 0.4020           | 0.1107          | 0.1927          | -0.6040                  | -0.1138                 | -0.6865                 |
| Y+0.0100 | 1.3221        | 1.4701       | 1.1561       | 0.3995           | 0.1098          | 0.1942          | -0.5927                  | -0.1099                 | -0.7068                 |

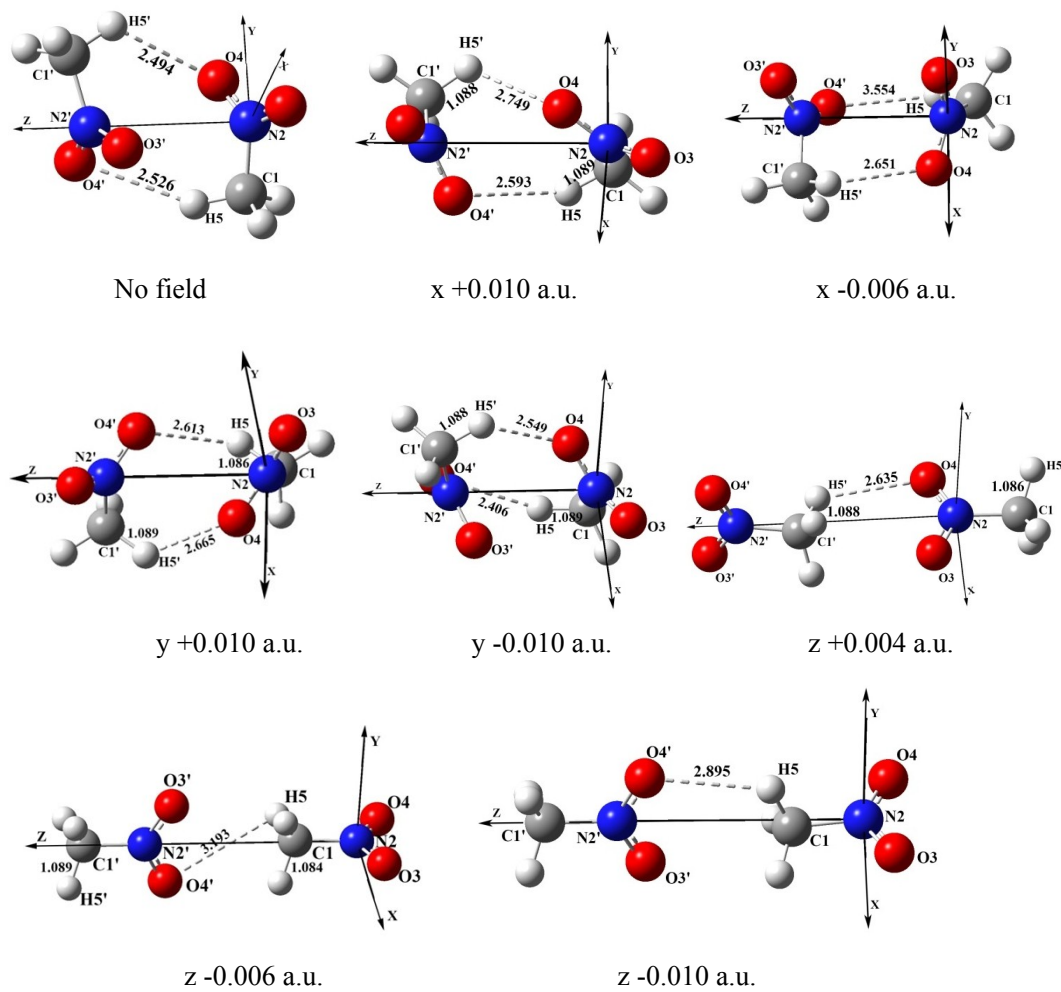

**Fig. S1** Selected structures of the nitromethane dimer in the different external electric field strengths and orientations (including those in no field) at the MP2/6-311++G(2d,p) level (geometric parameters are in Å).
